# Supplementary material for: The pigment binding behaviour of water-soluble chlorophyll protein (WSCP)
Source: Royal Society of Chemistry journal article supplement (doi:10.1039/d0pp00043d), 2020-04-20
Supplement: d0pp00043d1.pdf [file d0pp00043d1.pdf]

## Electronic Supplementary Material

### The pigment binding behaviour of Water-Soluble Chlorophyll Protein (WSCP)

Philipp Girr<sup>1,2</sup>, Jessica Kilper<sup>1</sup>, Anne-Christin Pohland<sup>1</sup>, Harald Paulsen<sup>1,\*</sup>

<sup>1</sup> Institute of Molecular Physiology, Johannes Gutenberg-University Mainz, Johannes-von-Müller-Weg 6, 55128 Mainz, Germany

<sup>2</sup> current address: Department of Biology, University of York, Heslington, York YO10 5DD, United Kingdom

\* paulsen@uni-mainz.de

### Contents

| <b>Tables:</b>                                                                                           | <b>Page</b> |
|----------------------------------------------------------------------------------------------------------|-------------|
| Table S1: Fitted parameters of the pigment-binding of WSCPs from TX-100 micelles.                        | 1           |
| Table S2: Fitted parameters of pigment-binding kinetics of WSCPs from TX-100 micelles.                   | 2           |
| <b>Figures:</b>                                                                                          | <b>Page</b> |
| Figure S1: First 30 s of time-resolved CD measurements of the Chl <i>a/b</i> binding to WSCP (Fig.2).    | 3           |
| Figure S2: First 30 s of time-resolved CD measurements of the Chlide <i>a/b</i> binding to WSCP (Fig.4). | 4           |
| Figure S3: First 30 s of time-resolved CD measurements of the Pheo <i>a/b</i> binding to WSCP (Fig.6).   | 5           |
| Figure S4: Pheo <i>a</i> binding to LvWSCP PCPS.                                                         | 6           |
| Figure S5: PChlide and Mg-Proto IX binding to LvWSCP.                                                    | 7           |
| Figure S6: Heme <i>b</i> binding to LvWSCP.                                                              | 8           |

**Table S1:** Fitted parameters of the pigment-binding of WSCPs from TX-100 micelles. CD Coefficient  $k$  in  $\text{mdeg}^*1*\mu\text{mol}^{-1}$ , chlorophyll concentration in  $\mu\text{M}$  and dissociation constant  $K_D$  in  $\mu\text{M}$ .

| <b>Sample</b>                          | <b>k</b>  | <b>[Chl]</b> | <b><math>K_D</math></b> | <b><math>R^2</math></b> |
|----------------------------------------|-----------|--------------|-------------------------|-------------------------|
| <b>LvWSCP<br/>Chl <i>a</i></b>         | 1.85±0.05 | 31.57±0.86   | 0.06±0.12               | 0.99                    |
| <b>LvWSCP<br/>Chl <i>b</i></b>         | 7.16±0.19 | 17.66±0.42   | 0.53±0.12               | 0.99                    |
| <b>BobWSCP<br/>Chl <i>a</i></b>        | 2.28±0.04 | 29.5±0.48    | 0.14±0.08               | 0.99                    |
| <b>BobWSCP<br/>Chl <i>b</i></b>        | 4.75±0.08 | 16.64±0.26   | 0.09±0.05               | 0.99                    |
| <b>LvWSCP<br/>PCPS Chl <i>a</i></b>    | 2.25±0.05 | 28.49±0.65   | 0.03±0.07               | 0.99                    |
| <b>LvWSCP<br/>PCPS Chl <i>b</i></b>    | 5.57±0.21 | 17.5±0.49    | 0.09±0.14               | 0.99                    |
| <b>LvWSCP<br/>Chlide <i>a</i></b>      | 2.27±0.53 | 11.97±2.52   | 2.56±1.17               | 0.98                    |
| <b>LvWSCP<br/>Chlide <i>b</i></b>      | 1.39±0.25 | 26.27±3.91   | 3.71±2.28               | 0.98                    |
| <b>BobWSCP<br/>Chlide <i>a</i></b>     | 1.61±0.69 | 11.27±4.37   | 1.6±1.77                | 0.91                    |
| <b>BobWSCP<br/>Chlide <i>b</i></b>     | 1.59±0.31 | 12.56±2.2    | 1.34±0.84               | 0.98                    |
| <b>LvWSCP<br/>PCPS Chlide <i>a</i></b> | 2.74±0.42 | 10.83±1.51   | 0.52±0.43               | 0.97                    |
| <b>LvWSCP<br/>PCPS Chlide <i>b</i></b> | 1.61±1.52 | 17.88±14.88  | 24.67±15                | 0.99                    |
| <b>LvWSCP<br/>Pheo <i>a</i></b>        | 3.22±1.11 | 21.72±8.24   | 72.95±11.42             | 0.99                    |
| <b>BobWSCP<br/>Pheo <i>a</i></b>       | 1.37±0.25 | 20.4±3.21    | 2.71±1.58               | 0.98                    |

**Table S2:** Fitted parameters of pigment-binding kinetics of WSCPs from TX-100 micelles. Amplitudes A in mdeg

| <b>Sample</b>                          | <b>A<sub>0</sub></b> | <b>A<sub>1</sub></b> | <b>τ<sub>1</sub></b> | <b>A<sub>2</sub></b> | <b>τ<sub>2</sub></b> | <b>R<sup>2</sup></b> |
|----------------------------------------|----------------------|----------------------|----------------------|----------------------|----------------------|----------------------|
| <b>LvWSCP<br/>Chl <i>a</i></b>         | 0.00±0.54            | 55.57±0.54           | 8.73±0.11            | 6.0±0.15             | 143.88±4.55          | 0.95                 |
| <b>LvWSCP<br/>Chl <i>b</i></b>         | -0.64±0.72           | 91.36±0.73           | 6.21±0.07            | 11.13±0.12           | 239.81±4.03          | 0.97                 |
| <b>BobWSCP<br/>Chl <i>a</i></b>        | 2.89±0.59            | 46.78±0.62           | 2.73±0.35            | 1.5±0.17             | 90.5±13.43           | 0.79                 |
| <b>BobWSCP<br/>Chl <i>b</i></b>        | -2.44±0.03           | 73.27±0.15           | 6.45±0.08            | 4.49±0.11            | 268.1±11.5           | 0.92                 |
| <b>LvWSCP PCPS<br/>Chl <i>a</i></b>    | -3.5±0.55            | 75.25±0.56           | 3.17±0.06            | 4.25±0.09            | 197.24±6.61          | 0.94                 |
| <b>LvWSCP PCPS<br/>Chl <i>b</i></b>    | -3.24±0.74           | 83.14±0.74           | 7.5±0.08             | 8.36±0.11            | 393.26±6.88          | 0.96                 |
| <b>LvWSCP<br/>Chlide <i>a</i></b>      | 3.51±0.17            | 20.58±0.18           | 4.08±0.1             | 2.74±0.08            | 59.07±1.92           | 0.94                 |
| <b>LvWSCP<br/>Chlide <i>b</i></b>      | -0.75±0.21           | 24.97±0.21           | 4.59±0.07            | 3.45±0.03            | 324.68±5.27          | 0.96                 |
| <b>BobWSCP<br/>Chlide <i>a</i></b>     | 3.5±0.2              | 14.37±0.22           | 5.03±0.14            | 0.27±0.12            | 55.4±24±71           | 0.84                 |
| <b>BobWSCP<br/>Chlide <i>b</i></b>     | 0.93±0.15            | 32.02±0.15           | 1.55±0.08            | 0.63±0.03            | 175.75±10.81         | 0.97                 |
| <b>LvWSCP PCPS<br/>Chlide <i>a</i></b> | 2.9±0.16             | 24.52±0.18           | 4.58±0.08            | 0.99±0.08            | 66.27±5.53           | 0.94                 |
| <b>LvWSCP PCPS<br/>Chlide <i>b</i></b> | 0.97±0.2             | 16.92±0.2            | 4.36±0.08            | 2.13±0.04            | 162.6±4.23           | 0.91                 |
| <b>LvWSCP<br/>Pheo <i>a</i></b>        | 0.71±0.08            | 8.93±0.08            | 12.06±0.14           | 22.85±0.03           | 155.04±0.20          | 0.99                 |
| <b>LvWSCP<br/>Pheo <i>b</i></b>        | 6.82±0.08            | 15.59±0.08           | 6.75±0.05            | 2.12±0.02            | 120.73±1.60          | 0.98                 |
| <b>BobWSCP<br/>Pheo <i>a</i></b>       | 0.82±0.18            | 29.8±0.18            | 5.89±0.05            | 2.25±0.02            | 314.47±5.93          | 0.97                 |
| <b>BobWSCP<br/>Pheo <i>b</i></b>       | 8.13±0.04            | 3.76±0.04            | 29.42±0.54           | 3.21±0.02            | 251.26±1.89          | 0.99                 |

and time constants τ in s.

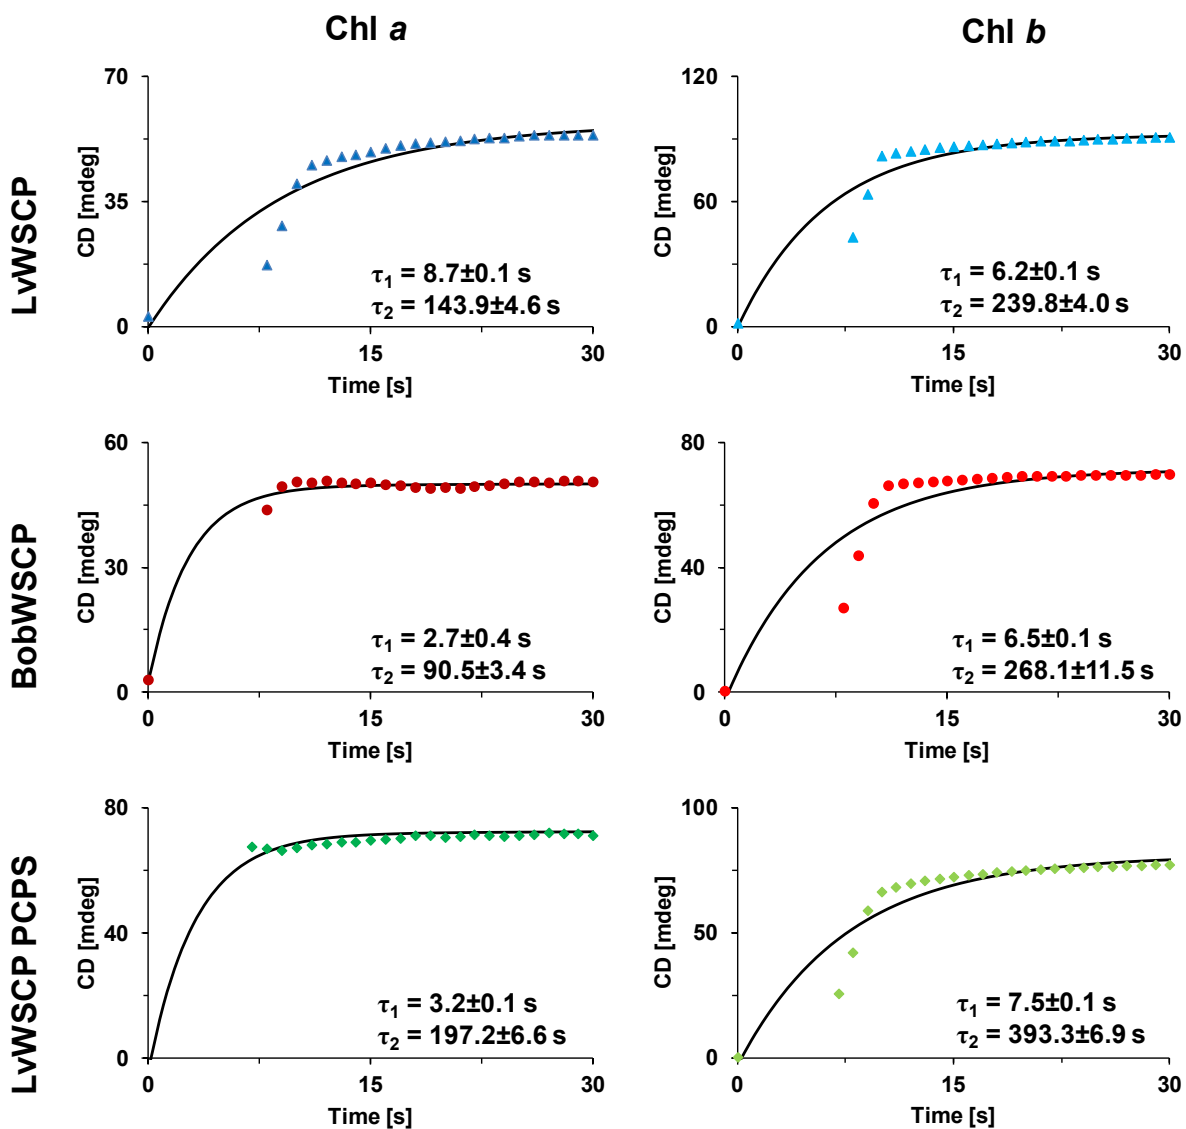

**Figure S1:** First 30 s of time-resolved CD measurements of the Chl *a/b* binding to LvWSCP (blue), BobWSCP (red) and LvWSCP PCPS (green) and the corresponding fits (black) (Fig. 2). 40  $\mu$ M WSCP (final) were mixed with 20  $\mu$ M Chl (final) in 0.1 % TX-100 (final) at RT. The experimental dead time amounts to 8 s for all measurements. The fitted time constants  $\tau$  (in s) are indicated for each measurement.

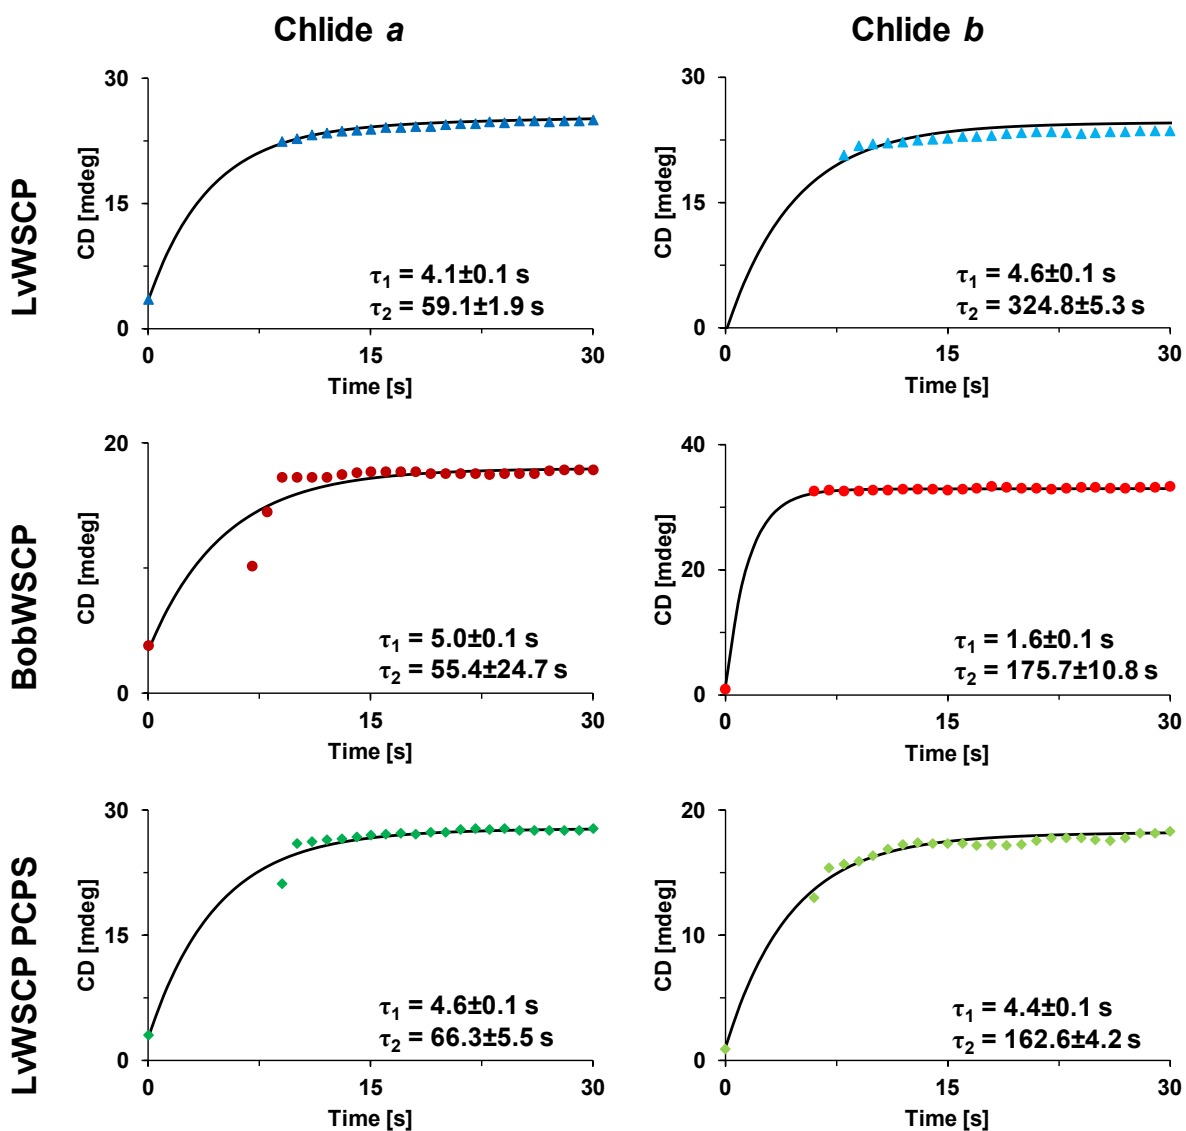

**Figure S2:** First 30 s of time-resolved CD measurements of the Chlide a/b binding to LvWSCP (blue), BobWSCP (red) and LvWSCP PCPS (green) and the corresponding fits (black) (Fig.4). 40  $\mu$ M WSCP (final) were mixed with 20  $\mu$ M Pheo (final) in 0.1 % TX-100 (final) at RT. The experimental dead time amounts to 6 s for BobWSCP Chlide b and LvWSCP PCPS Chlide b, to 7 s for BobWSCP Chlide a, to 8 s for LvWSCP Chlide b, and to 9s for LvWSCP Chlide a and LvWSCP PCPS Chlide a. The fitted time constants  $\tau$  (in s) are indicated for each measurement.

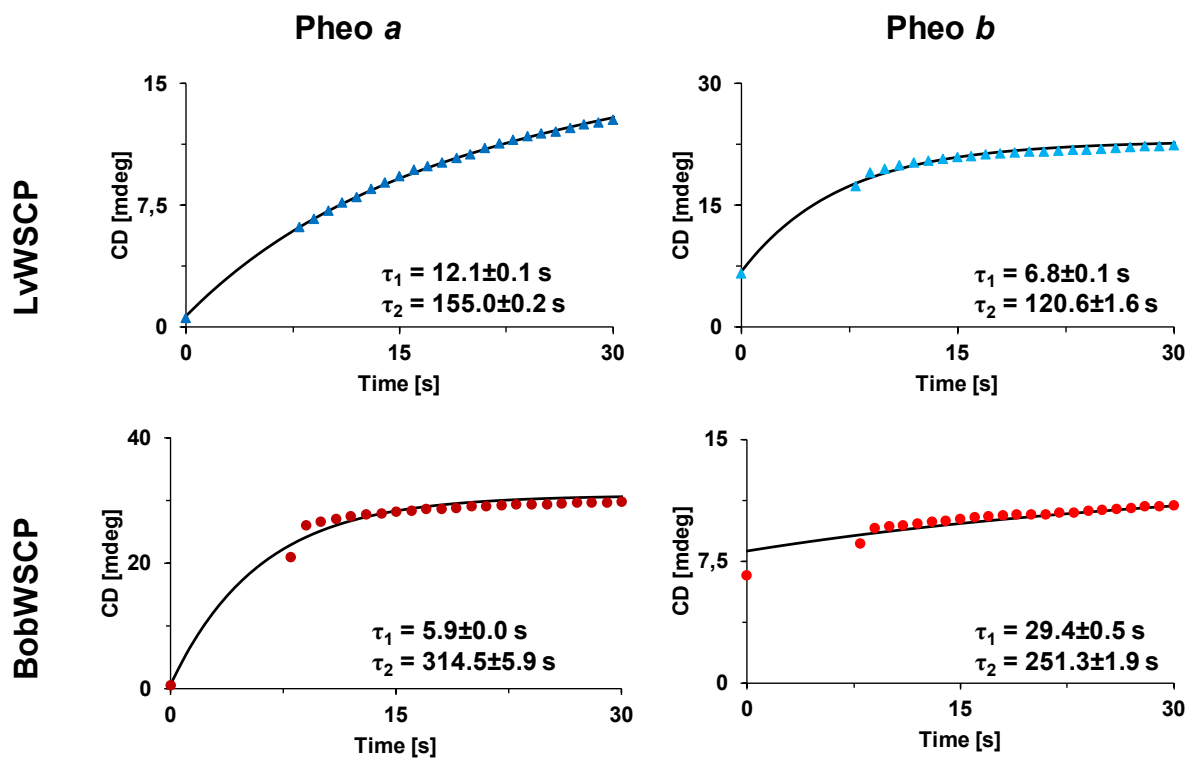

**Figure S3:** First 30 s of time-resolved CD measurements of the Pheo *a/b* binding to LvWSCP (blue) and BobWSCP (red) with and the corresponding fits (black) (Fig. 6). 40  $\mu$ M WSCP (final) were mixed with 20  $\mu$ M Pheo (final) in 0.1 % TX-100 (final) at RT. The experimental dead time amounts to 6 s for BobWSCP Pheo *a*, and to 8 s for all other measurements. The fitted time constants  $\tau$  (in s) are indicated for each measurement.

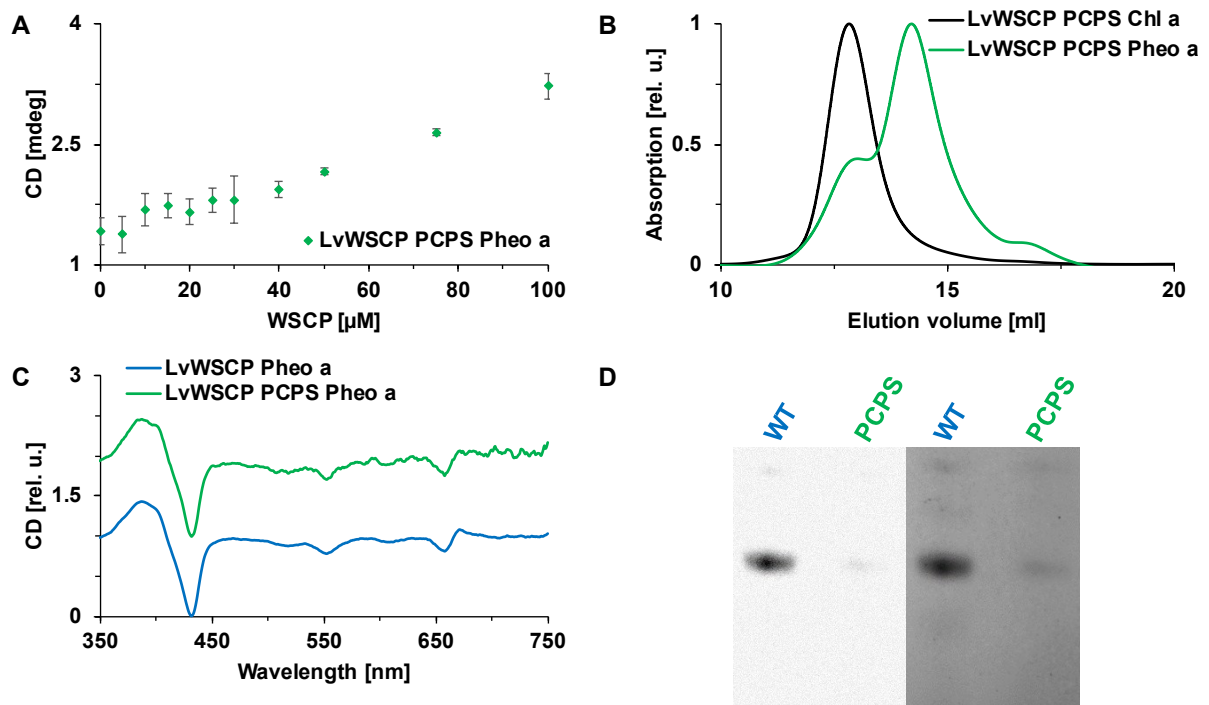

**Figure S4:** Pheo *a* binding to LvWSCP PCPS. **A** Titrations of Pheo *a* with LvWSCP PCPS. Data points are the means of three measurements and the errors are given as standard deviations. **B** SEC elution diagram of LvWSCP PCPS reconstituted with Pheo *a* (green) in comparison with LvWSCP PCPS Chl *a* tetramers (black). Protein absorption was detected at 280 nm. **C** CD spectra of purified LvWSCP Pheo *a* (blue) and LvWSCP PCPS Pheo *a* (green). **D** Native PAGE of LvWSCP Pheo *a* (WT) and LvWSCP PCPS Pheo *a* (PCPS). Tetramers were detected via fluorescence (left panel) and by coomassie staining (right panel).

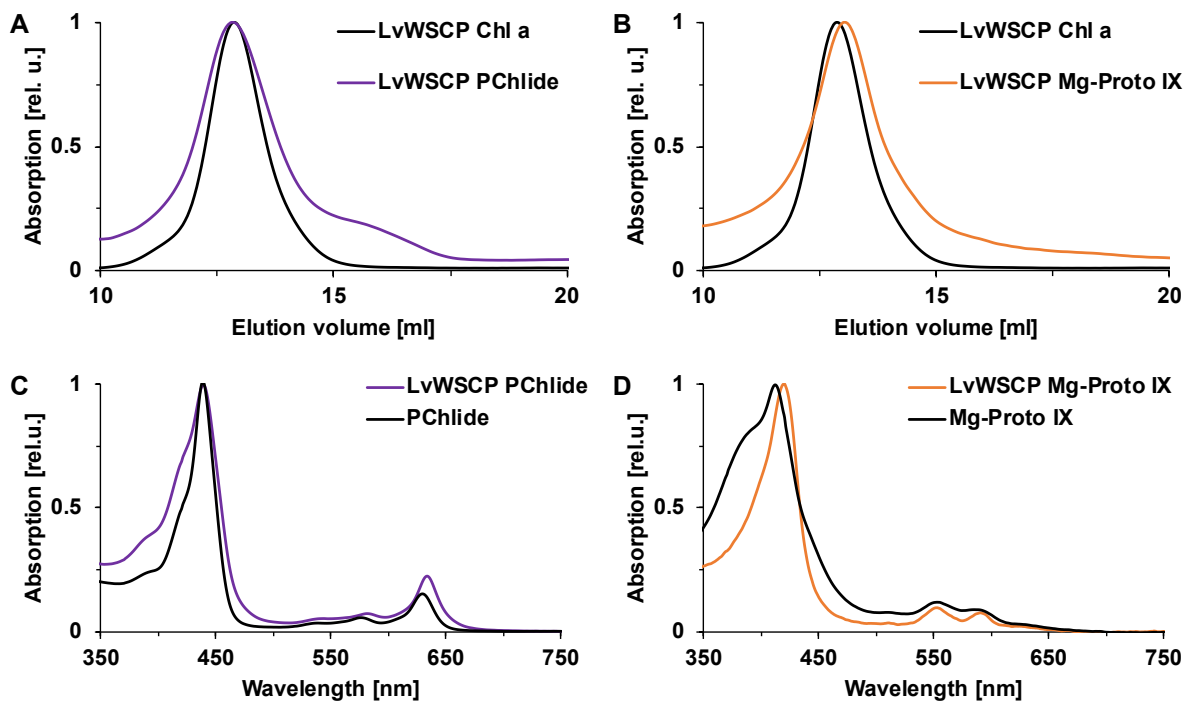

**Figure S4:** PChlide and Mg-Proto IX binding to LvWSCP. **A** SEC elution diagram of LvWSCP reconstituted with PChlide (purple) in comparison with LvWSCP Chl *a* tetramers (black). Chl *a* absorption was detected at 670 nm and PChlide absorption at 440 nm. **B** SEC elution diagram of LvWSCP reconstituted with Mg-Proto IX (orange) in comparison with LvWSCP Chl *a* tetramers (black). Chl *a* absorption was detected at 670 nm and PChlide absorption at 415 nm. **C** Absorption spectrum of purified LvWSCP PChlide (purple) in comparison with PChlide resolved in 2 % TX-100 (black). **D** Absorption spectrum of purified LvWSCP Mg-Proto IX (orange) in comparison with Mg-Proto IX resolved in water (black).



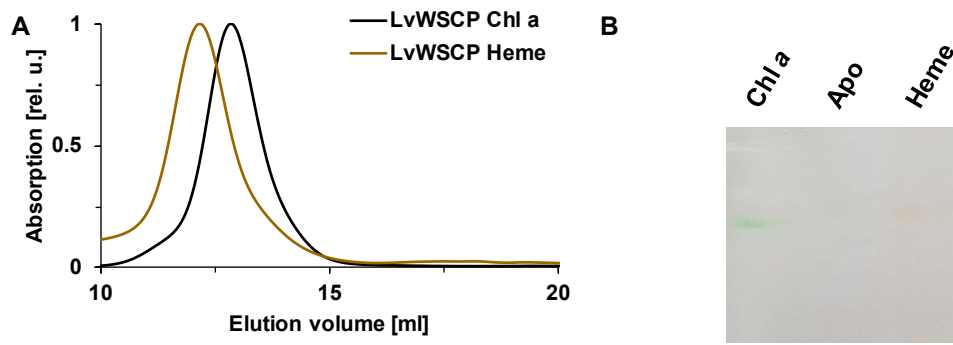

**Figure S5:** Heme *b* binding to LvWSCP. **A** SEC elution diagram of LvWSCP reconstituted with heme (brown) in comparison with LvWSCP Chl *a* tetramers (black). Chl *a* absorption was detected at 670 nm and heme absorption at 420 nm. **B** Native PAGE of LvWSCP heme reconstitution in comparison with LvWSCP Chl *a* and LvWSCP apoprotein. Unstained and unedited photograph of the gel. LvWSCP Chl *a* is visible as a green band and LvWSCP heme as a red band.
